# Supplementary material
Source: publisher site journal article supplement (https://bdj.pensoft.net/article/download/suppl/3653472/)
Supplement: Supplementary file 1 [file  › doc.kml]

<?xml version="1.0" encoding="UTF-8"?>
<kml xmlns="http://www.opengis.net/kml/2.2" xmlns:gx="http://www.google.com/kml/ext/2.2" xmlns:xsi="http://www.w3.org/2001/XMLSchema-instance"
 xsi:schemaLocation="http://www.opengis.net/kml/2.2 http://schemas.opengis.net/kml/2.2.0/ogckml22.xsd http://www.google.com/kml/ext/2.2 http://code.google.com/apis/kml/schema/kml22gx.xsd">
<Document id="Calathus_carvalhoi">
  <name>Calathus_carvalhoi</name>
  <Snippet></Snippet>
  <Folder id="FeatureLayer0">
    <name>Calathus_carvalhoi</name>
    <Snippet></Snippet>
    <Placemark id="ID_00000">
      <name>Calathus carvalhoi</name>
      <Snippet></Snippet>
      <description><![CDATA[<html xmlns:fo="http://www.w3.org/1999/XSL/Format" xmlns:msxsl="urn:schemas-microsoft-com:xslt">

<head>

<META http-equiv="Content-Type" content="text/html">

<meta http-equiv="content-type" content="text/html; charset=UTF-8">

</head>

<body style="margin:0px 0px 0px 0px;overflow:auto;background:#FFFFFF;">

<table style="font-family:Arial,Verdana,Times;font-size:12px;text-align:left;width:100%;border-collapse:collapse;padding:3px 3px 3px 3px">

<tr style="text-align:center;font-weight:bold;background:#9CBCE2">

<td>Calathus carvalhoi</td>

</tr>

<tr>

<td>

<table style="font-family:Arial,Verdana,Times;font-size:12px;text-align:left;width:100%;border-spacing:0px; padding:3px 3px 3px 3px">

<tr>

<td>FID</td>

<td>0</td>

</tr>

<tr bgcolor="#D4E4F3">

<td>Id</td>

<td>0</td>

</tr>

<tr>

<td>ID_NO</td>

<td>0</td>

</tr>

<tr bgcolor="#D4E4F3">

<td>BINOMIAL</td>

<td>Calathus carvalhoi</td>

</tr>

<tr>

<td>PRESENCE</td>

<td>1</td>

</tr>

<tr bgcolor="#D4E4F3">

<td>ORIGIN</td>

<td>1</td>

</tr>

<tr>

<td>SEASONAL</td>

<td>1</td>

</tr>

<tr bgcolor="#D4E4F3">

<td>COMPILER</td>

<td>Anja Danielczak</td>

</tr>

<tr>

<td>YEAR</td>

<td>2017</td>

</tr>

<tr bgcolor="#D4E4F3">

<td>CITATION</td>

<td>Paulo Borges</td>

</tr>

</table>

</td>

</tr>

</table>

</body>

</html>

]]></description>
      <styleUrl>#PolyStyle00</styleUrl>
      <MultiGeometry>
        <Polygon>
          <extrude>0</extrude>          <altitudeMode>clampToGround</altitudeMode>
          <outerBoundaryIs><LinearRing><coordinates> -27.24183930143444,38.6703331396696,0 -27.24180224938079,38.67039052916158,0 -27.24177272068599,38.67044612707355,0 -27.24175073930589,38.67049987997665,0 -27.24173633295847,38.67055171968878,0 -27.24173197525804,38.67057690534806,0 -27.2417295160755,38.67060159352375,0 -27.24172895483103,38.67063324740413,0 -27.24173107788839,38.67066658121759,0 -27.2417358845115,38.67070158367439,0 -27.24174337326021,38.67073824431961,0 -27.24175353797443,38.67077653951358,0 -27.24176638051923,38.67081648091889,0 -27.2417819022042,38.67085807374785,0 -27.24180012274622,38.67090137122798,0 -27.2418195847655,38.6709426579883,0 -27.24184088537363,38.67098287142918,0 -27.24186385935431,38.67102170036436,0 -27.24188836558993,38.6710589070754,0 -27.24191423247576,38.67109423937723,0 -27.24194137817167,38.67112759346627,0 -27.24196969449827,38.67115883669612,0 -27.24199909108358,38.67118786966989,0 -27.24204576736507,38.67122744388065,0 -27.24210173876029,38.67126765549077,0 -27.24216796693028,38.67130936317023,0 -27.24225619759963,38.67135997137228,0 -27.2423317124679,38.6713991162697,0 -27.24241363260371,38.67143573804234,0 -27.24250239212751,38.67147003335194,0 -27.24259878216661,38.67150230927797,0 -27.242701426686,38.67153226430628,0 -27.24281472702441,38.67156132403714,0 -27.24294117284906,38.67159020524144,0 -27.24309939649082,38.67162317049523,0 -27.24325628182605,38.6716539269226,0 -27.24338366134597,38.6716764158613,0 -27.24349963843333,38.67169382693036,0 -27.243606745652,38.67170646910813,0 -27.24370950714937,38.67171474927457,0 -27.24380657701472,38.67171841872212,0 -27.24389878885614,38.67171750776333,0 -27.24398661233895,38.67171200959901,0 -27.24413168761683,38.67169875460714,0 -27.24422477878437,38.67168823330389,0 -27.24430883421452,38.67167562800117,0 -27.24438222708469,38.67166085263148,0 -27.24444987083119,38.67164260187939,0 -27.2445088409232,38.67162129145225,0 -27.24455966772792,38.67159672775602,0 -27.24460259032162,38.67156879103737,0 -27.2446220410744,38.6715522454753,0 -27.24464021051769,38.67153312844943,0 -27.24465728281108,38.67151125052737,0 -27.24467356692876,38.6714862181826,0 -27.24470102332491,38.67143380671978,0 -27.24474766303427,38.67132701821606,0 -27.24476836213845,38.67128392533062,0 -27.24479291421384,38.6712416886776,0 -27.24481896483367,38.67120680304334,0 -27.24484182043819,38.67118202831094,0 -27.24486768684673,38.67115761503904,0 -27.24489675856353,38.67113337748388,0 -27.2449294016443,38.67110900935019,0 -27.24496727656097,38.67108337779919,0 -27.24501089980629,38.67105623370244,0 -27.24519757429107,38.6709496066123,0 -27.24527594920445,38.67090086395995,0 -27.24531608660797,38.67087253673937,0 -27.24535118859845,38.67084463161559,0 -27.24538195558743,38.67081658941993,0 -27.24540870988932,38.67078811100122,0 -27.24548593368867,38.67069453521295,0 -27.24551564075879,38.6706545368211,0 -27.24554107890008,38.6706168820128,0 -27.24556300778605,38.67058034538702,0 -27.24558115375253,38.67054525985506,0 -27.24559563537369,38.67051139489598,0 -27.24560650707456,38.67047862055519,0 -27.24561584118759,38.67043644008795,0 -27.24562090304934,38.67039141481263,0 -27.24562169633383,38.67034351556676,0 -27.24561822228999,38.67029268029936,0 -27.24561050607069,38.67023899072726,0 -27.24559851554596,38.6701820985554,0 -27.24558219814659,38.67012172856036,0 -27.24556131550704,38.67005699209307,0 -27.24554202410368,38.67000643283795,0 -27.24551896817543,38.66995538408474,0 -27.24549229987372,38.6699041834866,0 -27.2454622197471,38.66985321675169,0 -27.24542893411218,38.66980284215763,0 -27.24539275960862,38.66975354684073,0 -27.24535402325443,38.66970577664962,0 -27.24531309468507,38.66965998772778,0 -27.24526570115461,38.66961234387939,0 -27.24521382636015,38.66956563878104,0 -27.24515780450124,38.66952017379727,0 -27.24509804610016,38.66947628253125,0 -27.24503495462391,38.66943426736576,0 -27.24496911739108,38.66939452519412,0 -27.24490111332061,38.66935740564701,0 -27.24483157407772,38.66932325375587,0 -27.24471371765923,38.6692700948213,0 -27.24462544846126,38.66923585645517,0 -27.24458395570694,38.66922251655922,0 -27.24454437553545,38.66921184649009,0 -27.24450630487852,38.6692037383018,0 -27.24446952177675,38.66919814604231,0 -27.24440121052222,38.66919360946721,0 -27.24432431257167,38.66919544752813,0 -27.24423774263515,38.66920351095398,0 -27.24412643250398,38.66921919797557,0 -27.24406990752453,38.66923041626153,0 -27.24401305400073,38.66924672741139,0 -27.24395537657086,38.66926826920634,0 -27.24389600549736,38.669295364134,0 -27.24383799395046,38.66932614395366,0 -27.24377519082248,38.66936343727171,0 -27.24371128341557,38.66940447166302,0 -27.2435352623169,38.66952162744369,0 -27.24348037660501,38.66955576854355,0 -27.2434302873084,38.66958463893666,0 -27.24337147202622,38.6696150343481,0 -27.24331501937385,38.66964007891977,0 -27.24325982268575,38.6696602608335,0 -27.24320530600014,38.66967578502693,0 -27.24315567081518,38.66968630967168,0 -27.24309901187829,38.66969531811147,0 -27.24291705978379,38.66971581529698,0 -27.24285664455159,38.66972384712552,0 -27.24280405962283,38.6697330364917,0 -27.24275726399126,38.66974381799134,0 -27.24267521383672,38.66976716550177,0 -27.24259443160776,38.66979369163943,0 -27.24251559539259,38.66982317340284,0 -27.24243930058352,38.66985538781943,0 -27.24236616718854,38.66989006685319,0 -27.24229657134562,38.66992702563317,0 -27.24223092050193,38.66996604742124,0 -27.2421695437143,38.67000693622042,0 -27.24212011126414,38.6700431662041,0 -27.24207437989937,38.67007942965455,0 -27.24203255211405,38.67011556563968,0 -27.24199475391808,38.67015146471421,0 -27.24193565791288,38.67021347839364,0 -27.24188380032843,38.67027408368271,0 -27.24183930143444,38.6703331396696,0</coordinates></LinearRing></outerBoundaryIs>
        </Polygon>
        <Polygon>
          <extrude>0</extrude>          <altitudeMode>clampToGround</altitudeMode>
          <outerBoundaryIs><LinearRing><coordinates> -27.24879274439694,38.672320552371,0 -27.24884912454317,38.67230443699165,0 -27.24890388890915,38.67229412783555,0 -27.24895833187669,38.67228868590976,0 -27.24901608608725,38.67228689416737,0 -27.24907776671466,38.67228872858949,0 -27.24914461224653,38.67229422369262,0 -27.24926853063165,38.67231121193486,0 -27.2495584526167,38.67236140927852,0 -27.24963074881456,38.67237116885358,0 -27.24969571689027,38.67237743945404,0 -27.24975690687178,38.67238048511898,0 -27.24981413725836,38.67238020500963,0 -27.24986818641726,38.67237659388795,0 -27.24991948539035,38.67236962026271,0 -27.25004970861248,38.67234708324116,0 -27.25013160762857,38.67233105081188,0 -27.25020554089835,38.67231366204497,0 -27.250269716546,38.67229500358441,0 -27.25032854543231,38.67227347905929,0 -27.25037932785368,38.67224970262231,0 -27.25042252936281,38.67222345438706,0 -27.25045835653825,38.67219460460455,0 -27.25048782432626,38.67216469118073,0 -27.25051539771112,38.67213207749673,0 -27.25054016309378,38.67209784810029,0 -27.25056147453656,38.67206289979919,0 -27.25057873382926,38.67202828613034,0 -27.25059182661374,38.67199432605028,0 -27.25060056773186,38.67196150373402,0 -27.25060487027499,38.67193015300298,0 -27.25060472676847,38.67191001473532,0 -27.25060166466659,38.67188742574913,0 -27.25057980048208,38.67180238398946,0 -27.25057418515156,38.67176714281685,0 -27.25057472495589,38.67172374643297,0 -27.25058247195458,38.67167613550036,0 -27.25059834492195,38.67162010354666,0 -27.25064100820929,38.67150163568169,0 -27.2506568026609,38.67145055551122,0 -27.2506632796822,38.67142271072424,0 -27.25066743083051,38.67139682406609,0 -27.25066933928843,38.67137236841784,0 -27.25066902285942,38.67134907920971,0 -27.25066237620705,38.67129614653221,0 -27.25064892041592,38.67124114393994,0 -27.25062855403193,38.67118363330931,0 -27.25060098336693,38.67112277715628,0 -27.25056897221568,38.67106310216597,0 -27.25052918583013,38.67099720703871,0 -27.25039007798494,38.6707890796573,0 -27.25033696208648,38.67072031501246,0 -27.25032647007615,38.67070332245669,0 -27.25031983968776,38.67068796897063,0 -27.25031554793736,38.67066486113247,0 -27.25031719712708,38.67064000632546,0 -27.25032479193321,38.67061326940552,0 -27.2503384118201,38.67058436346955,0 -27.25035636136449,38.67055558116301,0 -27.25038013270087,38.67052366085616,0 -27.25046635029249,38.67042351628777,0 -27.25049565469544,38.67039410297408,0 -27.25053239836424,38.67036689457565,0 -27.25057692462339,38.6703416275059,0 -27.25063004106711,38.67031783962124,0 -27.25068033153705,38.6702992144495,0 -27.25073930041161,38.67028035830526,0 -27.2509359664521,38.67022584123471,0 -27.25100172082518,38.6702062247973,0 -27.25106081513954,38.67018569044276,0 -27.25110955739449,38.67016496261263,0 -27.25115283040821,38.67014139031152,0 -27.25118721705004,38.67011610508826,0 -27.25120126864556,38.67010268254419,0 -27.25121326999069,38.67008869640076,0 -27.25122325040268,38.67007411235972,0 -27.25123122946518,38.67005890160164,0 -27.25124002940812,38.67003690230689,0 -27.25124741883489,38.67001320080342,0 -27.2512578143596,38.66996121332819,0 -27.25126216342342,38.66990417729708,0 -27.25126032844383,38.66984383433622,0 -27.25125232758087,38.66978195923162,0 -27.25123844958527,38.6697210707438,0 -27.25121921424458,38.66966343596794,0 -27.25119528000306,38.66961102451776,0 -27.25116625905206,38.66955844473876,0 -27.2511393970925,38.66951503310863,0 -27.25111241831881,38.66947711896724,0 -27.251085030474,38.66944436753516,0 -27.2510565822323,38.66941611251794,0 -27.25102731149429,38.6693927036809,0 -27.25099713190983,38.66937407260175,0 -27.25096600155472,38.6693601945549,0 -27.25093318220007,38.66935048629772,0 -27.25089401700766,38.6693430081131,0 -27.25084860133222,38.66933756655322,0 -27.25078153942445,38.6693323297886,0 -27.25075390525432,38.66933134418668,0 -27.25072495908879,38.6693323165106,0 -27.25066162139138,38.66934021470518,0 -27.25060133726205,38.66935290351193,0 -27.25046140222623,38.66938791070779,0 -27.25039428829645,38.66940045153423,0 -27.25036331195255,38.66940391004138,0 -27.25033415868029,38.66940536951932,0 -27.25030640760171,38.66940485017062,0 -27.25027982552707,38.6694023459907,0 -27.25023451779398,38.66939528305052,0 -27.25019175913689,38.66938663061497,0 -27.25015224743336,38.66937653107196,0 -27.25011635219742,38.66936508098591,0 -27.250079372271,38.66934805961068,0 -27.25004304596353,38.66932341325483,0 -27.25000423815959,38.66928870292976,0 -27.24992748079048,38.66920755298085,0 -27.24989279392298,38.66917471706677,0 -27.2498726078681,38.66915861124797,0 -27.24985272046786,38.66914521032771,0 -27.24983272633438,38.6691342428129,0 -27.2498124077181,38.66912559258214,0 -27.2497840341277,38.66911643430883,0 -27.2497529976536,38.66910876656583,0 -27.24971904486765,38.66910252461485,0 -27.2496816552239,38.66909761175366,0 -27.2496033730869,38.66909176406306,0 -27.24945519199106,38.66908670995279,0 -27.24939252136126,38.66908486621257,0 -27.24932874916028,38.66908480652724,0 -27.24919831484009,38.66909003675898,0 -27.24906477040821,38.66910236588917,0 -27.24892912508781,38.66912170134617,0 -27.2487923510747,38.66914791205604,0 -27.24865570883566,38.66918076401181,0 -27.24852039147708,38.66921997050662,0 -27.24838762087301,38.66926517780523,0 -27.24825874321223,38.66931591584805,0 -27.24813475869506,38.66937177899562,0 -27.24801675632077,38.6694322761233,0 -27.24790571343598,38.66949690581876,0 -27.24785312948294,38.6695305784325,0 -27.2478026010693,38.66956509195192,0 -27.24775422006487,38.66960038360062,0 -27.2477080695605,38.66963639274258,0 -27.24766423180795,38.66967305473858,0 -27.2476227700277,38.66971031623028,0 -27.24758374744867,38.66974812036436,0 -27.24754721959048,38.66978641332283,0 -27.24748289418401,38.66985955892586,0 -27.2474246882998,38.66993176902545,0 -27.24737282324561,38.67000276836721,0 -27.24732743115615,38.67007237486718,0 -27.24728863886379,38.67014038426174,0 -27.24725647394527,38.67020673657283,0 -27.24723098316018,38.67027133497864,0 -27.24721219515907,38.67033410627406,0 -27.24720021959366,38.67039427764105,0 -27.24719254488371,38.67046204222699,0 -27.24718878215586,38.67053683696587,0 -27.24718716591131,38.67065462042502,0 -27.24718785687362,38.67069221351416,0 -27.247190844565,38.67073154043504,0 -27.24719615671323,38.67077300114722,0 -27.24720389291833,38.67081738300036,0 -27.24722249643248,38.67090022861395,0 -27.2472746197829,38.67110211578471,0 -27.24728645960403,38.67115731316687,0 -27.24729483475056,38.67120692844946,0 -27.24730065798168,38.67126021252318,0 -27.24730240372927,38.67131001982042,0 -27.24730010024851,38.67135722019968,0 -27.24729372076126,38.67140227051723,0 -27.24728445538423,38.67143946259989,0 -27.24726998560171,38.67148077479867,0 -27.24721125291806,38.67161307889386,0 -27.24719282269371,38.67165954331907,0 -27.2471796887009,38.67170357873431,0 -27.24717302616998,38.67174352391164,0 -27.24717141005798,38.67177194264755,0 -27.24717173526371,38.67180103993256,0 -27.24717400213043,38.67183085400721,0 -27.24717821439494,38.67186143486192,0 -27.2471924999884,38.67192509781143,0 -27.24721475584407,38.67199277092755,0 -27.24724348915924,38.67206152610039,0 -27.24728062233116,38.67213709901387,0 -27.24732485544636,38.67221790815042,0 -27.24740068051092,38.67234857806394,0 -27.24747359919894,38.67248914509698,0 -27.2474912655731,38.67251993559653,0 -27.24750843049978,38.67254640454252,0 -27.24752960725725,38.67257427995861,0 -27.2475516422564,38.67259810715549,0 -27.24757492673428,38.67261830625964,0 -27.24759968104236,38.67263506292879,0 -27.24762249505693,38.67264723780784,0 -27.24764826897496,38.6726585772731,0 -27.24770892593737,38.67267884538561,0 -27.24778189902165,38.67269604650713,0 -27.24787295652726,38.67271154536599,0 -27.2479054256843,38.67271511613737,0 -27.24793824399858,38.672716223527,0 -27.24797147848053,38.67271486995575,0 -27.24800521481603,38.67271105205615,0 -27.24803951076726,38.67270476761784,0 -27.24807453381268,38.67269599013056,0 -27.24811043461308,38.67268468237284,0 -27.24814743350497,38.67267077530142,0 -27.24821437076254,38.67264050735255,0 -27.24828807435239,38.67260101938971,0 -27.24836155325869,38.67255718332635,0 -27.24855862526083,38.67243398233218,0 -27.24861828796866,38.67239954554837,0 -27.24867235202547,38.67237107496573,0 -27.24873418533592,38.67234262844196,0 -27.24879274439694,38.672320552371,0</coordinates></LinearRing></outerBoundaryIs>
        </Polygon>
        <Polygon>
          <extrude>0</extrude>          <altitudeMode>clampToGround</altitudeMode>
          <outerBoundaryIs><LinearRing><coordinates> -27.20392502291325,38.74191998853213,0 -27.20375725146539,38.74197193134305,0 -27.20356522679874,38.74202730321283,0 -27.20335615959828,38.74208447536337,0 -27.20272582691547,38.74225257178063,0 -27.20252813649301,38.74230806719785,0 -27.2023528334464,38.7423599986047,0 -27.20215687193819,38.74242228415926,0 -27.20197871880807,38.74248408768922,0 -27.20181517855482,38.7425465211797,0 -27.20166472833871,38.74261017347475,0 -27.20158178428796,38.74264842393457,0 -27.20150282884634,38.74268733493228,0 -27.20142772816083,38.74272697251745,0 -27.20135638029534,38.74276739060238,0 -27.20128867949095,38.74280865028072,0 -27.20122457511035,38.74285078367341,0 -27.20116400623929,38.7428938308645,0 -27.201106924448,38.74293782633391,0 -27.20105322553295,38.74298285690731,0 -27.20100294487409,38.74302889985547,0 -27.20095605222134,38.74307598291172,0 -27.20091252309114,38.74312413069937,0 -27.20087233334674,38.74317337044337,0 -27.20083546872725,38.74322372019109,0 -27.20080191409419,38.74327520064494,0 -27.20077165723336,38.74332783057733,0 -27.20073258718382,38.74340384230748,0 -27.20069634241375,38.74348124352864,0 -27.20066352068978,38.74355875475646,0 -27.2006345334625,38.74363540059962,0 -27.20060977629018,38.74371008747905,0 -27.20058935212757,38.74378244855721,0 -27.20057341019615,38.74385195292614,0 -27.20056203795944,38.74391821568088,0 -27.20055628233654,38.74397187138412,0 -27.20055392717846,38.74402669866979,0 -27.20055497409562,38.7440826607284,0 -27.20055942233213,38.74413971575959,0 -27.20056726943901,38.74419782525307,0 -27.20057850830593,38.74425693255246,0 -27.20059312867767,38.74431698351679,0 -27.20061111559716,38.74437791656762,0 -27.20063248170463,38.74443975243258,0 -27.20065717849823,38.74450233212067,0 -27.20068517457823,38.74456557593126,0 -27.20071642990758,38.74462939330958,0 -27.2007509052735,38.74469370209354,0 -27.20078853591658,38.74475837959124,0 -27.20082925485389,38.74482331055204,0 -27.20087298060999,38.74488836494775,0 -27.20092071446776,38.74495488295783,0 -27.2009713794654,38.7450212227072,0 -27.20102484431143,38.74508721215165,0 -27.20108095422876,38.74515266013523,0 -27.20113956128924,38.74521739196896,0 -27.20120044838745,38.74528116580941,0 -27.20126340242267,38.7453437583365,0 -27.20132818255194,38.7454049299762,0 -27.20139473094065,38.74546461202029,0 -27.20146257287025,38.74552236494892,0 -27.20153140957615,38.74557793435798,0 -27.20160092172981,38.74563106238293,0 -27.20167079190201,38.74568150569532,0 -27.20174066989011,38.74572901073168,0 -27.20181021375987,38.74577334504048,0 -27.20187908213324,38.74581429097782,0 -27.20195843371577,38.74585577328739,0 -27.20204339585865,38.74589253697679,0 -27.20213416063706,38.74592466568589,0 -27.20223098888991,38.74595225212632,0 -27.20233405066062,38.74597535792312,0 -27.20244390965233,38.74599412160313,0 -27.20256110093899,38.74600863610774,0 -27.20268645470394,38.74601900522575,0 -27.20279478205659,38.74602443112663,0 -27.2029101258499,38.74602724205097,0 -27.20303369121796,38.74602747074638,0 -27.20316785165424,38.74602512322657,0 -27.20342499796763,38.74601533867887,0 -27.203905741754,38.74598976497044,0 -27.20409626228569,38.74598092279282,0 -27.20428886796619,38.74597479975203,0 -27.20446041297904,38.74597294179436,0 -27.20464601476839,38.74597617090205,0 -27.20481647229703,38.74598538554594,0 -27.20489703577542,38.74599229012075,0 -27.20497474452062,38.74600074956917,0 -27.20504978889666,38.74601078470691,0 -27.20512231269743,38.74602241488681,0 -27.20528840536426,38.74605441669328,0 -27.20547255428657,38.74609580277506,0 -27.20564674316722,38.74613884844908,0 -27.20605232196041,38.74624330631387,0 -27.20624990888389,38.74629085689004,0 -27.20643032212485,38.74632924998237,0 -27.20659524410899,38.74635843091127,0 -27.20673947171679,38.7463800413335,0 -27.20688499237718,38.74639985762249,0 -27.20703166826914,38.74641786101037,0 -27.20717936025141,38.74643403441801,0 -27.20732792773424,38.74644836246129,0 -27.20747723084451,38.74646083166147,0 -27.20762712882922,38.74647143026527,0 -27.20777748154448,38.74648014836513,0 -27.20792813046711,38.74648697712463,0 -27.20807895577998,38.74649191146686,0 -27.20822981989964,38.74649494689414,0 -27.20838058763217,38.74649608068941,0 -27.20853112167838,38.74649531188788,0 -27.20868129460573,38.74649264120775,0 -27.20883097728924,38.74648807095005,0 -27.20898004438396,38.74648160494648,0 -27.20912807825376,38.74647326705098,0 -27.20927525782562,38.7464630529485,0 -27.20942146706098,38.74645097069757,0 -27.20956659452234,38.74643702951238,0 -27.20971052679753,38.7464212403851,0 -27.20985316432954,38.74640361433541,0 -27.20999440564743,38.74638416390824,0 -27.21013415421267,38.746362902404,0 -27.21027227680582,38.74633985097342,0 -27.21040872488587,38.74631501861015,0 -27.21054341232803,38.74628842099427,0 -27.2106762578427,38.74626007418495,0 -27.21080717880288,38.74622999591852,0 -27.21093610539862,38.74619820234035,0 -27.21106296628749,38.74616471104976,0 -27.21118769458339,38.74612953971099,0 -27.21165958004962,38.74599288194309,0 -27.21192892176768,38.74591256820666,0 -27.21218480728028,38.7458323217,0 -27.21241427803139,38.74575555933122,0 -27.21263710713807,38.74567515149141,0 -27.21284135221832,38.74559482070443,0 -27.21293723139304,38.74555440009619,0 -27.21302912511292,38.74551373379747,0 -27.21311716445354,38.74547276374081,0 -27.21320144585629,38.74543144496246,0 -27.21328555757234,38.74538786974251,0 -27.21336573196383,38.74534383215536,0 -27.21344203113264,38.74529929805241,0 -27.21351450273956,38.7452542395664,0 -27.21358319623241,38.74520862541105,0 -27.21364813528089,38.74516243929035,0 -27.21370934825692,38.74511566100291,0 -27.21376685754874,38.7450682734115,0 -27.21382071211948,38.74502023304668,0 -27.21387089398419,38.74497155261011,0 -27.21391741671341,38.74492221892132,0 -27.21396029110012,38.74487222051512,0 -27.21399952774701,38.7448215447646,0 -27.21403513255541,38.74477018375862,0 -27.21406711186057,38.74471812834501,0 -27.21409547062952,38.74466537042155,0 -27.21412648491236,38.74459940898209,0 -27.21415531040861,38.74453000876967,0 -27.21418181188349,38.74445749499715,0 -27.21420585391584,38.74438223776718,0 -27.214227317253,38.74430460412371,0 -27.21424607184434,38.74422505739411,0 -27.21426201022762,38.74414405315682,0 -27.21427503797878,38.74406207091075,0 -27.21428507846463,38.74397958931132,0 -27.21429206978311,38.7438971119688,0 -27.21429597043559,38.74381512926406,0 -27.21429675792999,38.74373411480291,0 -27.21429442931019,38.74365455595356,0 -27.21428899796416,38.74357684888964,0 -27.21428049220084,38.74350139651751,0 -27.21426895277763,38.74342855913577,0 -27.21424821870432,38.74333333387955,0 -27.21422045461742,38.74323622053221,0 -27.21418574703611,38.74313752283582,0 -27.2141442195969,38.74303759320866,0 -27.21409599969469,38.74293675183368,0 -27.21404131439494,38.74283548528594,0 -27.21398040888762,38.74273424823829,0 -27.21391358729662,38.74263354677423,0 -27.21384084914291,38.74253344653054,0 -27.213762908231,38.74243499119596,0 -27.2136802260452,38.74233876400422,0 -27.213593321904,38.74224536968033,0 -27.21350273405297,38.74215538894293,0 -27.21340907533721,38.74206943279409,0 -27.21331296486797,38.74198806935174,0 -27.21321503330161,38.74191183251147,0 -27.21315693545808,38.74187015477385,0 -27.21309534226499,38.74182911587657,0 -27.21303018155141,38.7417886676187,0 -27.21296135600489,38.74174874950923,0 -27.21288879976386,38.74170932057606,0 -27.21281230917809,38.74167026756368,0 -27.21273169302362,38.74163149253646,0 -27.21264666738018,38.74159285873007,0 -27.21247012316422,38.74151863422676,0 -27.2122711089101,38.74144225500439,0 -27.21204945479462,38.74136322944055,0 -27.2117241885197,38.7412527171241,0 -27.21154657180453,38.74119594592873,0 -27.21136466023999,38.74114417553645,0 -27.21117845936275,38.74109740752291,0 -27.21098797484435,38.74105564331269,0 -27.21079321256001,38.74101888418988,0 -27.21059417828324,38.74098713124037,0 -27.21039087794854,38.74096038541031,0 -27.21018331743331,38.74093864747239,0 -27.20997150691536,38.74092191832749,0 -27.2097554479243,38.74091019793491,0 -27.20953514601269,38.74090348659393,0 -27.20931060619099,38.74090178445584,0 -27.20908183451372,38.7409050915209,0 -27.20884883346053,38.74091340770913,0 -27.20861160624116,38.74092673290152,0 -27.2083701542997,38.74094506701348,0 -27.20812490571183,38.74096836540515,0 -27.20787544497373,38.74099665563094,0 -27.20762176796711,38.74102993814747,0 -27.20736386560138,38.7410682141393,0 -27.20710173575272,38.74111148366347,0 -27.20683534870088,38.74115975137529,0 -27.206564679387,38.74121302178868,0 -27.20628968825662,38.74127130266822,0 -27.20601065100544,38.74133452848191,0 -27.20572718042767,38.7414027799878,0 -27.20543918772161,38.74147607848609,0 -27.20514653527761,38.74155445894298,0 -27.20484917718972,38.74163793117478,0 -27.20454672975589,38.74172660050157,0 -27.20423886466665,38.74182056282331,0 -27.20392502291325,38.74191998853213,0</coordinates></LinearRing></outerBoundaryIs>
        </Polygon>
      </MultiGeometry>
    </Placemark>
  </Folder>
  <Style id="PolyStyle00">
    <LabelStyle>
      <color>00000000</color>
      <scale>0.000000</scale>
    </LabelStyle>
    <LineStyle>
      <color>ff00ffff</color>
      <width>1.500000</width>
    </LineStyle>
    <PolyStyle>
      <color>00f0f0f0</color>
      <outline>1</outline>
    </PolyStyle>
  </Style>
</Document>
</kml>
